# Supplementary material
Source: Springer Nature journal article supplement (https://www.springermedizin.de/resource/supplementary/12865_2012_512_MOESM3_ESM.pdf/9428212)

IL-4 (pg/ml)

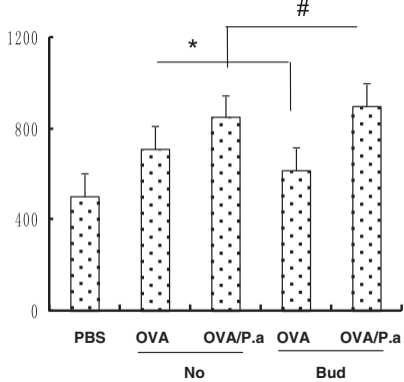

IFN- $\gamma$  (pg/ml)

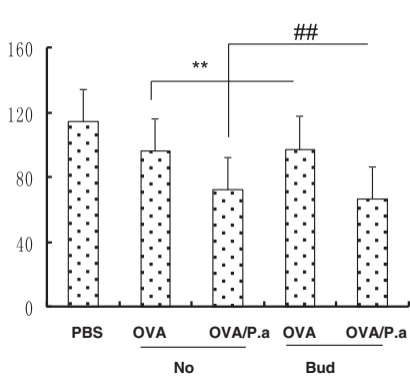

Supplement: MOESM3 [file 9428212]
